# Supplementary material for: Lamin is essential for nuclear localization of the GPI synthesis enzyme PIG-B and GPI-anchored protein production in Drosophila
Source: PubMed Central journal article supplement (PMC7104860; doi:10.1242/jcs.238527), 2020-03-26
Supplement: joces-133-238527-s1.pdf [file joces-133-238527-s1.pdf]

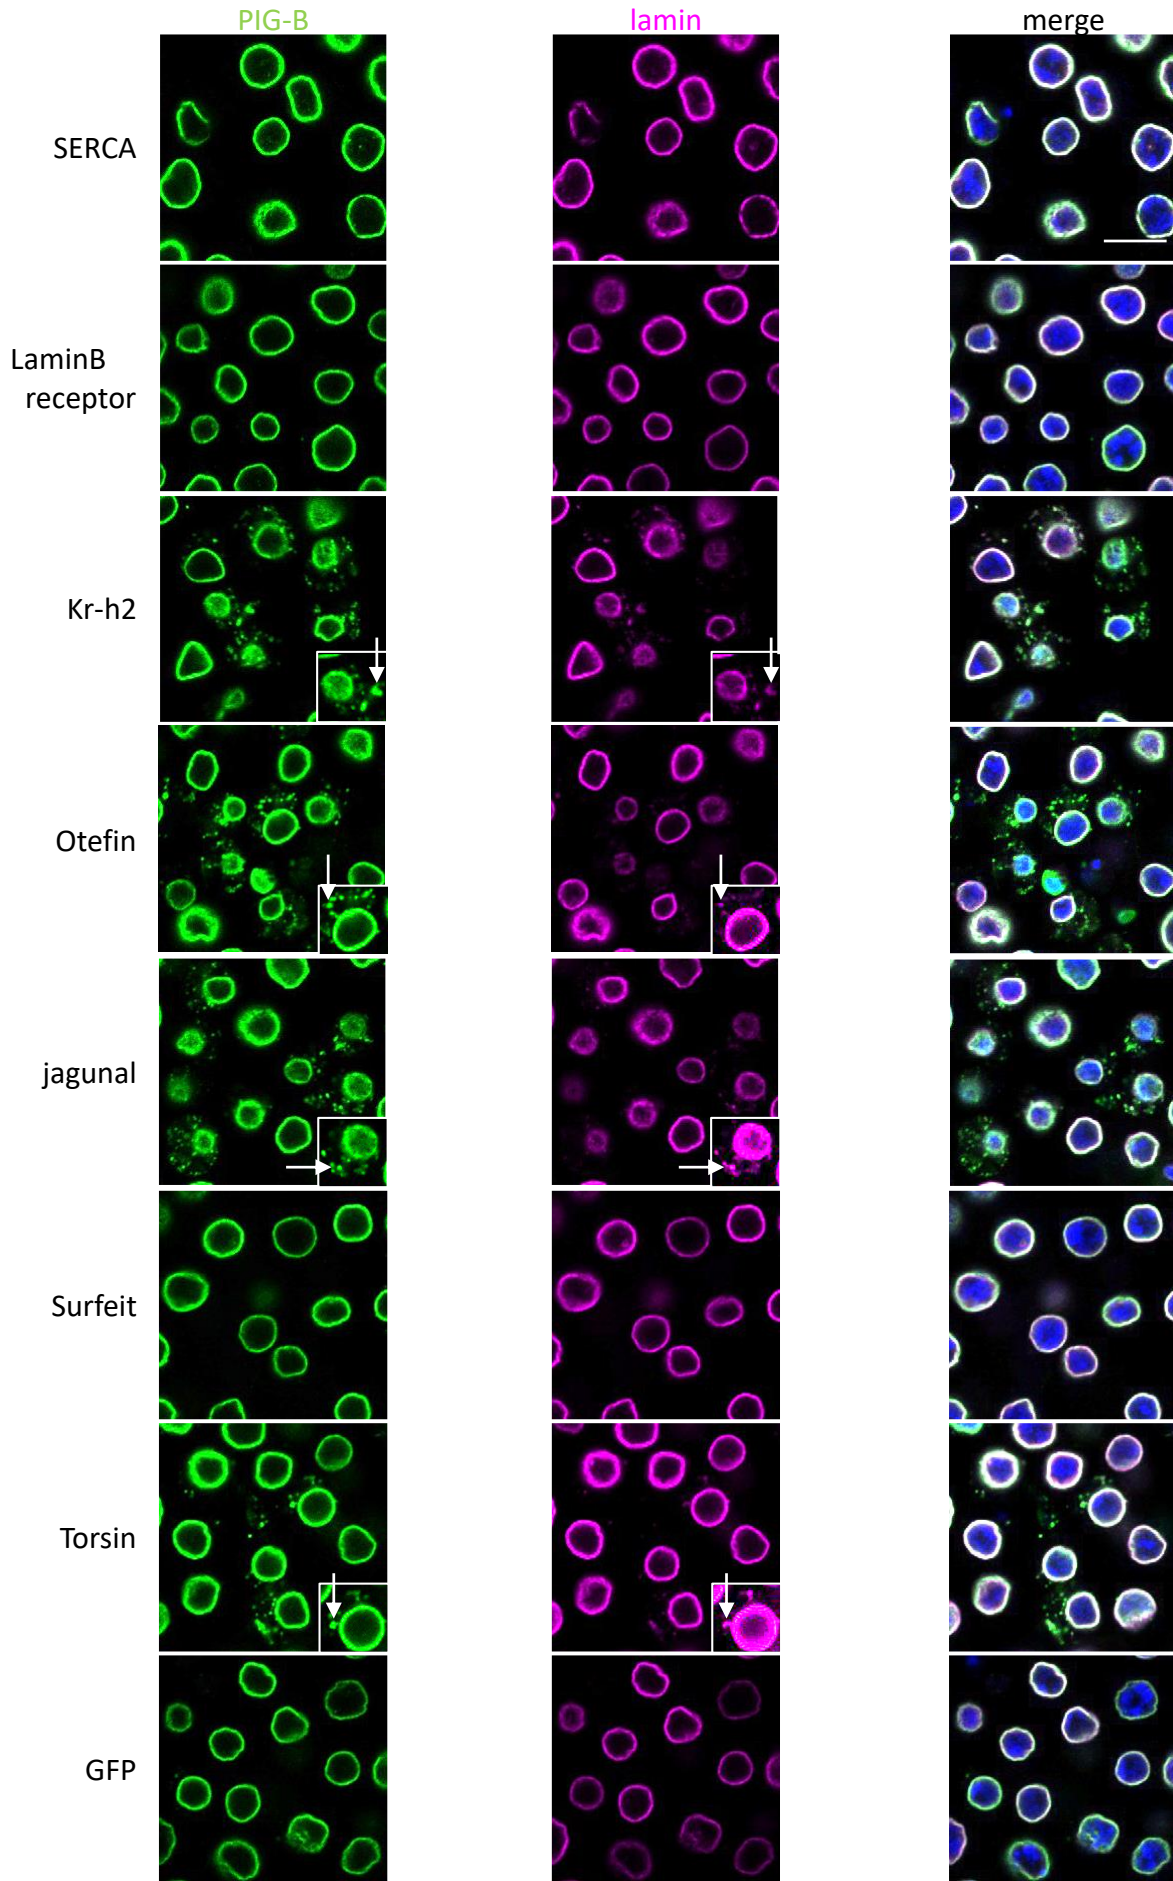

**Figure. S1 Localization of PIG-B in S2 cells depleted of the PIG-B-binding molecules shown in Table 1**

Cells were stained with an anti-PIG-B antibody (green), an anti-Lamin Dm0 antibody (magenta), and DAPI (blue). The insets show enlarged images. White arrows indicate PIG-B localized to the cytoplasm with Lamin Dm0. Bar, 10  $\mu$ m.

(A)

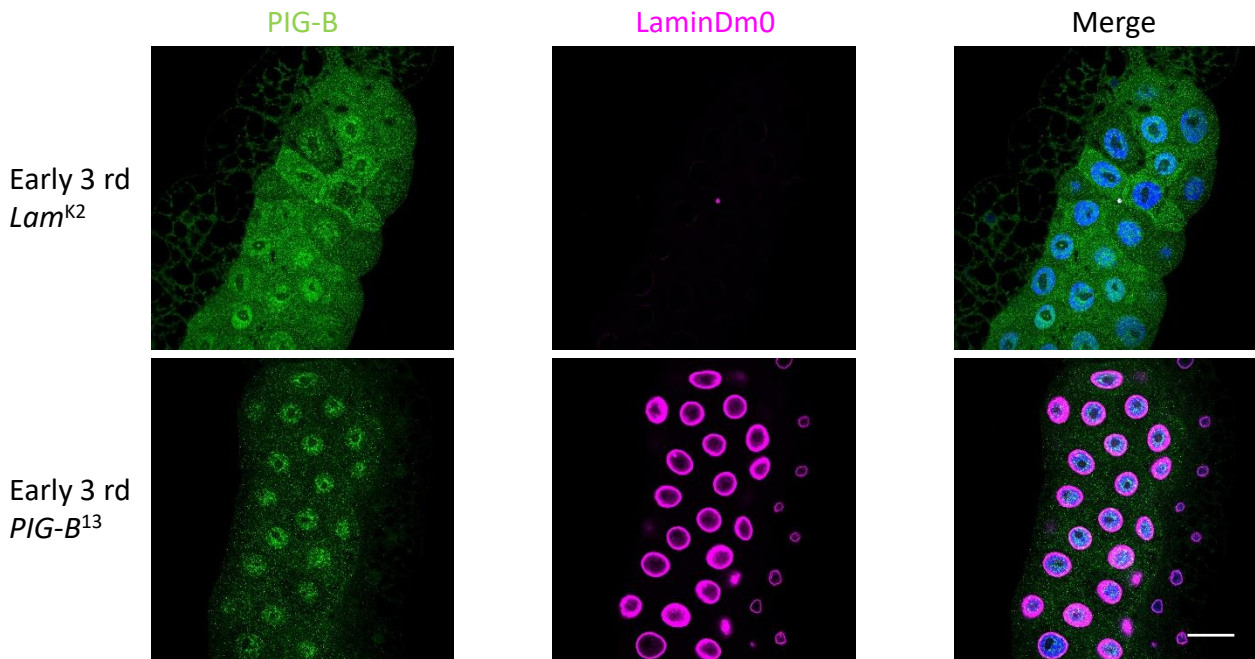

(B)

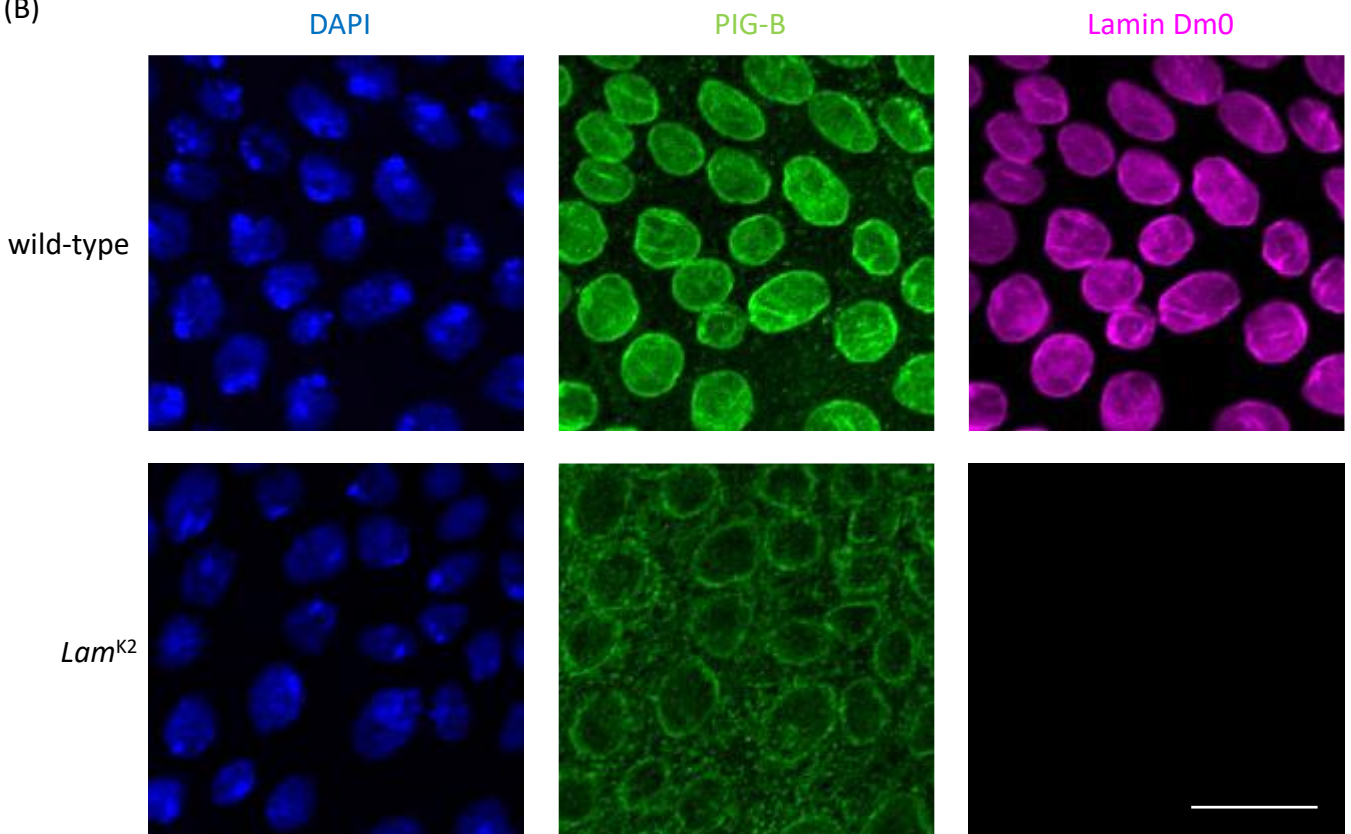

**Figure S2 Localization of PIG-B in the *Lamin Dm0* and *PIG-B* mutants.**

(A) Immunofluorescence analysis of PIG-B in salivary glands of early third instar larvae of the *Lamin Dm0* mutant (*Lam<sup>K2</sup>*) and the *PIG-B* mutant (*PIG-B<sup>13</sup>*). Salivary glands were stained with an anti-PIG-B antibody (green), an anti-Lamin Dm0 antibody (magenta), and DAPI (blue). Bar, 40  $\mu\text{m}$ .

(B) Immunofluorescence analysis of PIG-B in the peripodial membrane of the wild-type, *Lamin Dm0* mutant (*Lam<sup>K2</sup>*). The peripodial membrane were stained with an anti-PIG-B antibody (green), an anti-Lamin Dm0 antibody (magenta), and DAPI (blue). Bar, 10  $\mu\text{m}$ .

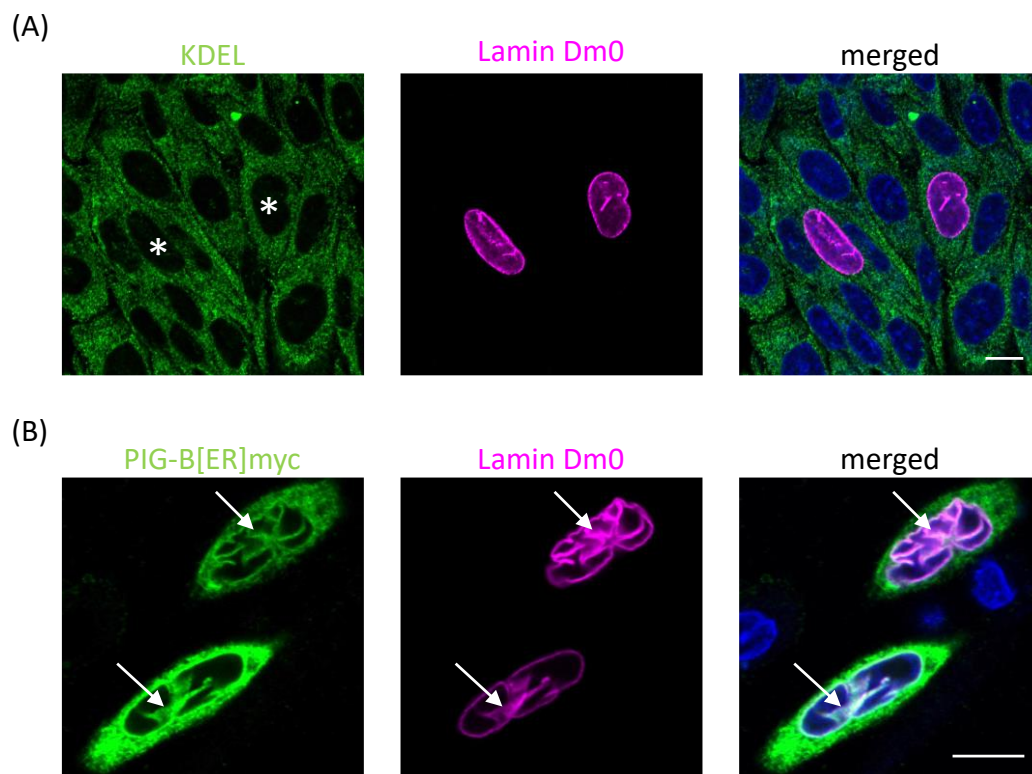

**Figure S3 Immunostaining of Lamin Dm0-expressing CHO cells.**

- (A) Distribution of ER in CHO cells. CHO cells were stained with an anti-KDEL antibody (ER marker) (green), an anti-Lamin Dm0 antibody (magenta), and DAPI (blue). Asterisks indicate CHO cells expressing Lamin Dm0. No difference of appearance of the ER was observed between Lamin Dm0 expressing and no expressing cells. Bar, 10  $\mu$ m.
- (B) Immunofluorescence analysis of CHO cells expressing ER-localized myc-tagged PIG-B (PIG-B[ER]myc) together with Lamin Dm0 strongly. Cells were stained with an anti-myc antibody (green), an anti-Lamin Dm0 antibody (magenta), and DAPI (blue). White arrows indicate co-localization of PIG-B[ER]myc and Lamin Dm0 in the nucleoplasm. Bar, 10  $\mu$ m.

### **Table S1. 2DICAL data for PIG-B-associated proteins obtained from immunoprecipitation experiments**

Proteins identified by immunoprecipitation experiments followed by 2DCAL are listed in order of fold changes between precipitates with PIG-B and the control. (column A) Protein ID. (column B) Protein description and gene name (GN). (column C) Average signal intensities of identified peptides from immunoprecipitates in S2 cells. (column D,E) Average signal intensities of identified peptides in each experiment from immunoprecipitates in PIG-B-Flag expressing S2 cells. (column F) ave (PIG-B-Flag IP 1,2) normalized by control. (column G) Subcellular localization annotated by Uniprot. Red character indicates selected genes in Table 1.

[Click here to Download Table S1](#)

### **Table S2. 2DICAL data for lamin-associated proteins obtained from proximity-dependent labeling**

Proteins identified by a proximity-dependent labeling assay with Lamin Dm0-TubolD followed by 2DCAL are listed in order of fold changes between precipitates labelled with Lamin Dm0-TubolD and the control. (column A) Protein ID. (column B) Protein description and gene name (GN). (column C,D,E) Average signal intensities of identified peptides in each experiment from V5-mT-Lamin biotinylated fraction. (column F, G, H) Average signal intensities of identified peptides in each experiment from V5-mT biotinylated fraction. (column I) Average of signal intensity from V5-mT-Lamin (C, D, E). (column J) Average of signal intensity of V5-mT (F, G, H). (column K) V5-mT-Lamin normalized by V5-mT (I/J). (column L) p-value (C,D,E vs. F,G,H). Statistical analysis was performed with Student's t-tests using Microsoft Excel. (column L) Subcellular localization annotated by Uniprot.

[Click here to Download Table S2](#)

**Table S3 Primary antibodies used in this study**

| antibody                             | Description                                 | Cat. No.     | lot No.     | dilution    |                 |
|--------------------------------------|---------------------------------------------|--------------|-------------|-------------|-----------------|
|                                      |                                             |              |             | Immuno blot | Immuno staining |
| rabbit anti-PIG-B                    | Yamamoto-Hino et. al., (2018)               |              |             | 1:20000     | 1:10000         |
| mouse anti-DYKDDDDK tag 1E6          | Wako Junyaku                                | 012-22383    | WDL0641     | 1:20000     | -               |
| rabbit anti-myc A14                  | Santa cruz                                  | sc-789       | H1308       | -           | 1:500           |
| rabbit anti-V5 D3H8Q                 | Cell signaling                              | #13202       |             | 1:2000      | -               |
| mouse anti-V5                        | Invitrogen                                  | R960-25      | 1869182     | -           | 1:1000          |
| rat anti-HA 3F10                     | Roche                                       | #11867423001 |             | 1:2000      | 1:500           |
| mouse anti-lamin Dm0 ADL67.10        | Developmental Studies Hybridoma Bank (DSHB) |              |             | 1:2000      | 1:1000          |
| mouse anti-lamin C LC28.20           | Developmental Studies Hybridoma Bank (DSHB) |              |             | -           | 1:500           |
| rat anti- $\alpha$ tubulin           | Oxford Biotechnonology                      | OBT0045      | 1002        | 1:2000      | -               |
| mouse anti-KDEL 10C3                 | Stressgen                                   | SPA-827      | B404464     | -           | 1:500           |
| Streptavidin-HRP                     | abcam                                       | ab7403       | GR3230032-5 | 1:10000     | -               |
| Alexa Fluor 488-labeled Streptavidin | Thermo                                      | s11223       |             | -           | 1:500           |
| Alexa Fluor 488-labeled FLAER        | CEDARLANE                                   | FL1S-C       | 1803/3A     | -           | 1 mM            |
| Rhodamin-labeled phalloidin          | Thermo                                      | R415         | 2105247     | -           | 1:250           |

**Table S4 Primers used to generate double-stranded RNA in this study**

| CG No.  | Name                      | sequence (5'-3')                                     |
|---------|---------------------------|------------------------------------------------------|
| CG3725  | 3725R F1                  | CCATTGAGGCCCTCAAGGAGTACG                             |
|         | 3725R R1                  | GTCGTTGAAGTGGCCGATGTTGATG                            |
|         | T73725R F1                | gatcactaatacgaactcactatagggCCATTGAGGCCCTCAAGGAGTACG  |
|         | T73725R R1                | gatcactaatacgaactcactatagggGTCGTTGAAGTGGCCGATGTTGATG |
| CG6944  | Lam 1306-1806 dsRNA F1    | CCATCGCGTCGCACTCCCTC                                 |
|         | Lam 1306-1806 dsRNA R1    | TTGCCGTCCACGGCGGTCAC                                 |
|         | T7Lam 1306-1806 dsRNA F1  | gatcactaatacgaactcactatagggCCATCGCGTCGCACTCCCTC      |
|         | T7Lam 1306-1806 dsRNA R1  | gatcactaatacgaactcactatagggTTGCCGTCCACGGCGGTCAC      |
| CG6202  | 6202R F1                  | CGAGTACATAGCGAAAACGGAGG                              |
|         | 6202R R1                  | TGATGAACATGAAGGCCAGCAGG                              |
|         | T76202R F1                | gatcactaatacgaactcactatagggCGAGTACATAGCGAAAACGGAGG   |
|         | T76202R R1                | gatcactaatacgaactcactatagggTGATGAACATGAAGGCCAGCAGG   |
| CG3024  | TorsinIR F1               | ATGATGAGCTTTCCACGCATGTTA                             |
|         | TorsinIR R1               | CTACGCAAGGTATCGCGCACCGC                              |
|         | T7TorsinIR F1             | gatcactaatacgaactcactatagggATGATGAGCTTTCCACGCATGTTA  |
|         | T7TorsinIR R1             | gatcactaatacgaactcactatagggCTACGCAAGGTATCGCGCACCGC   |
| CG17952 | GD2133 F1                 | CGCAAACGCATAACCGAACGACTG                             |
|         | GD2133 R1                 | TGGGCAGAAGTAGCAGGAACAGG                              |
|         | T7GD2133 F1               | gatcactaatacgaactcactatagggCGCAAACGCATAACCGAACGACTG  |
|         | T7GD2133 R1               | gatcactaatacgaactcactatagggTGGGCAGAAGTAGCAGGAACAGG   |
| CG10978 | 10978R F1                 | GCACCGATGGCAACGACTTCGAG                              |
|         | 10978R R1                 | CGTGCACCTGGAAGCCCACAAAG                              |
|         | T710978R F1               | gatcactaatacgaactcactatagggGCACCGATGGCAACGACTTCGAG   |
|         | T710978R R1               | gatcactaatacgaactcactatagggCGTGCACCTGGAAGCCCACAAAG   |
| CG9159  | 9159R 1F                  | AACCGCAGCAATCTCAATCACAG                              |
|         | 9159R 2R                  | AGGCATGATGAAGATCTCGCAGA                              |
|         | T79159R 1F                | gatcactaatacgaactcactatagggAACCGCAGCAATCTCAATCACAG   |
|         | T79159R 2R                | gatcactaatacgaactcactatagggAGGCATGATGAAGATCTCGCAGA   |
| CG5581  | 5581R F1                  | ATGCTGGCACAGGGGCTGCCAAC                              |
|         | 5581R R1                  | CTCCTCTCGATCAGCGCGCTTCG                              |
|         | T75581R F1                | gatcactaatacgaactcactatagggATGCTGGCACAGGGGCTGCCAAC   |
|         | T75581R R1                | gatcactaatacgaactcactatagggCTCCTCTCGATCAGCGCGCTTCG   |
| CG10119 | LamC 1269-1768 dsRNA F1   | GACCGCCAGTGCCAGTTCCC                                 |
|         | LamC 1269-1768 dsRNA R1   | AGGTGTGGCTGGAAACGTTA                                 |
|         | T7LamC 1269-1768 dsRNA F1 | gatcactaatacgaactcactatagggGACCGCCAGTGCCAGTTCCC      |
|         | T7LamC 1269-1768 dsRNA R1 | gatcactaatacgaactcactatagggAGGTGTGGCTGGAAACGTTA      |
